# Supplementary material
Source: HighWire-hosted journal article supplement (https://bmjopensem.bmj.com/content/5/1/e000523)
Supplement: inline-supplementary-material-1 [file inline-supplementary-material-1.pdf]

**Study of Competitive Road Cyclists**

Please complete this column

|                        |                                                                                                                                                                                                              |
|------------------------|--------------------------------------------------------------------------------------------------------------------------------------------------------------------------------------------------------------|
| <b>Subject</b>         | Name<br>Age<br>Height (m)<br>Weight (kg)                                                                                                                                                                     |
| <b>Cycling history</b> | Training load: average hours on bike per week<br>Weekly TSS (if known)<br>Current 60 min Functional Threshold Power: watts<br><br>Race highlights<br><br>BC points won<br>Weekly hours S&C or cross training |
| <b>Nutrition</b>       | Weight steady?<br>Were you trying to change weight and/or change body composition?<br>Any changes in nutrition during training/racing block, including change/addition of supplements?                       |
| <b>Medical</b>         | Any injuries since last scan?<br><br>Any illness since last scan, requiring one or more days off training?<br>Any medications (not usually taken) required since last scan?                                  |
